# Supplementary material
Source: publisher figshare collection journal article supplement (https://tandf.figshare.com/ndownloader/files/17844104)
Supplement: Supplementary file 1 [file 17844104]

**Supporting Information**

**Enzymatic dimerization of phenylacetylene by laccase immobilized on magnetic nanoparticles via click chemistry**

Mehdi Mogharabi-Manzari1,2, Marjan Heydari1, Salar Sadeghian-Abadi1, Mahsa Yousefi-Mokri1 and Mohammad Ali Faramarzi*,1

*1 Department of Pharmaceutical Biotechnology, Faculty of Pharmacy and Biotechnology Research Center, Tehran University of Medical Sciences, P.O. Box 14155*–*6451, Tehran 1417614411, Iran*

*2 The Institute of Pharmaceutical Sciences, Tehran University of Medical Sciences, Tehran 1417614411, Iran*

-----------------------------------------

*Corresponding author: Tel: +98-21-66954712; Fax: +98-21-66954712; E-mail: faramarz@tums.ac.ir


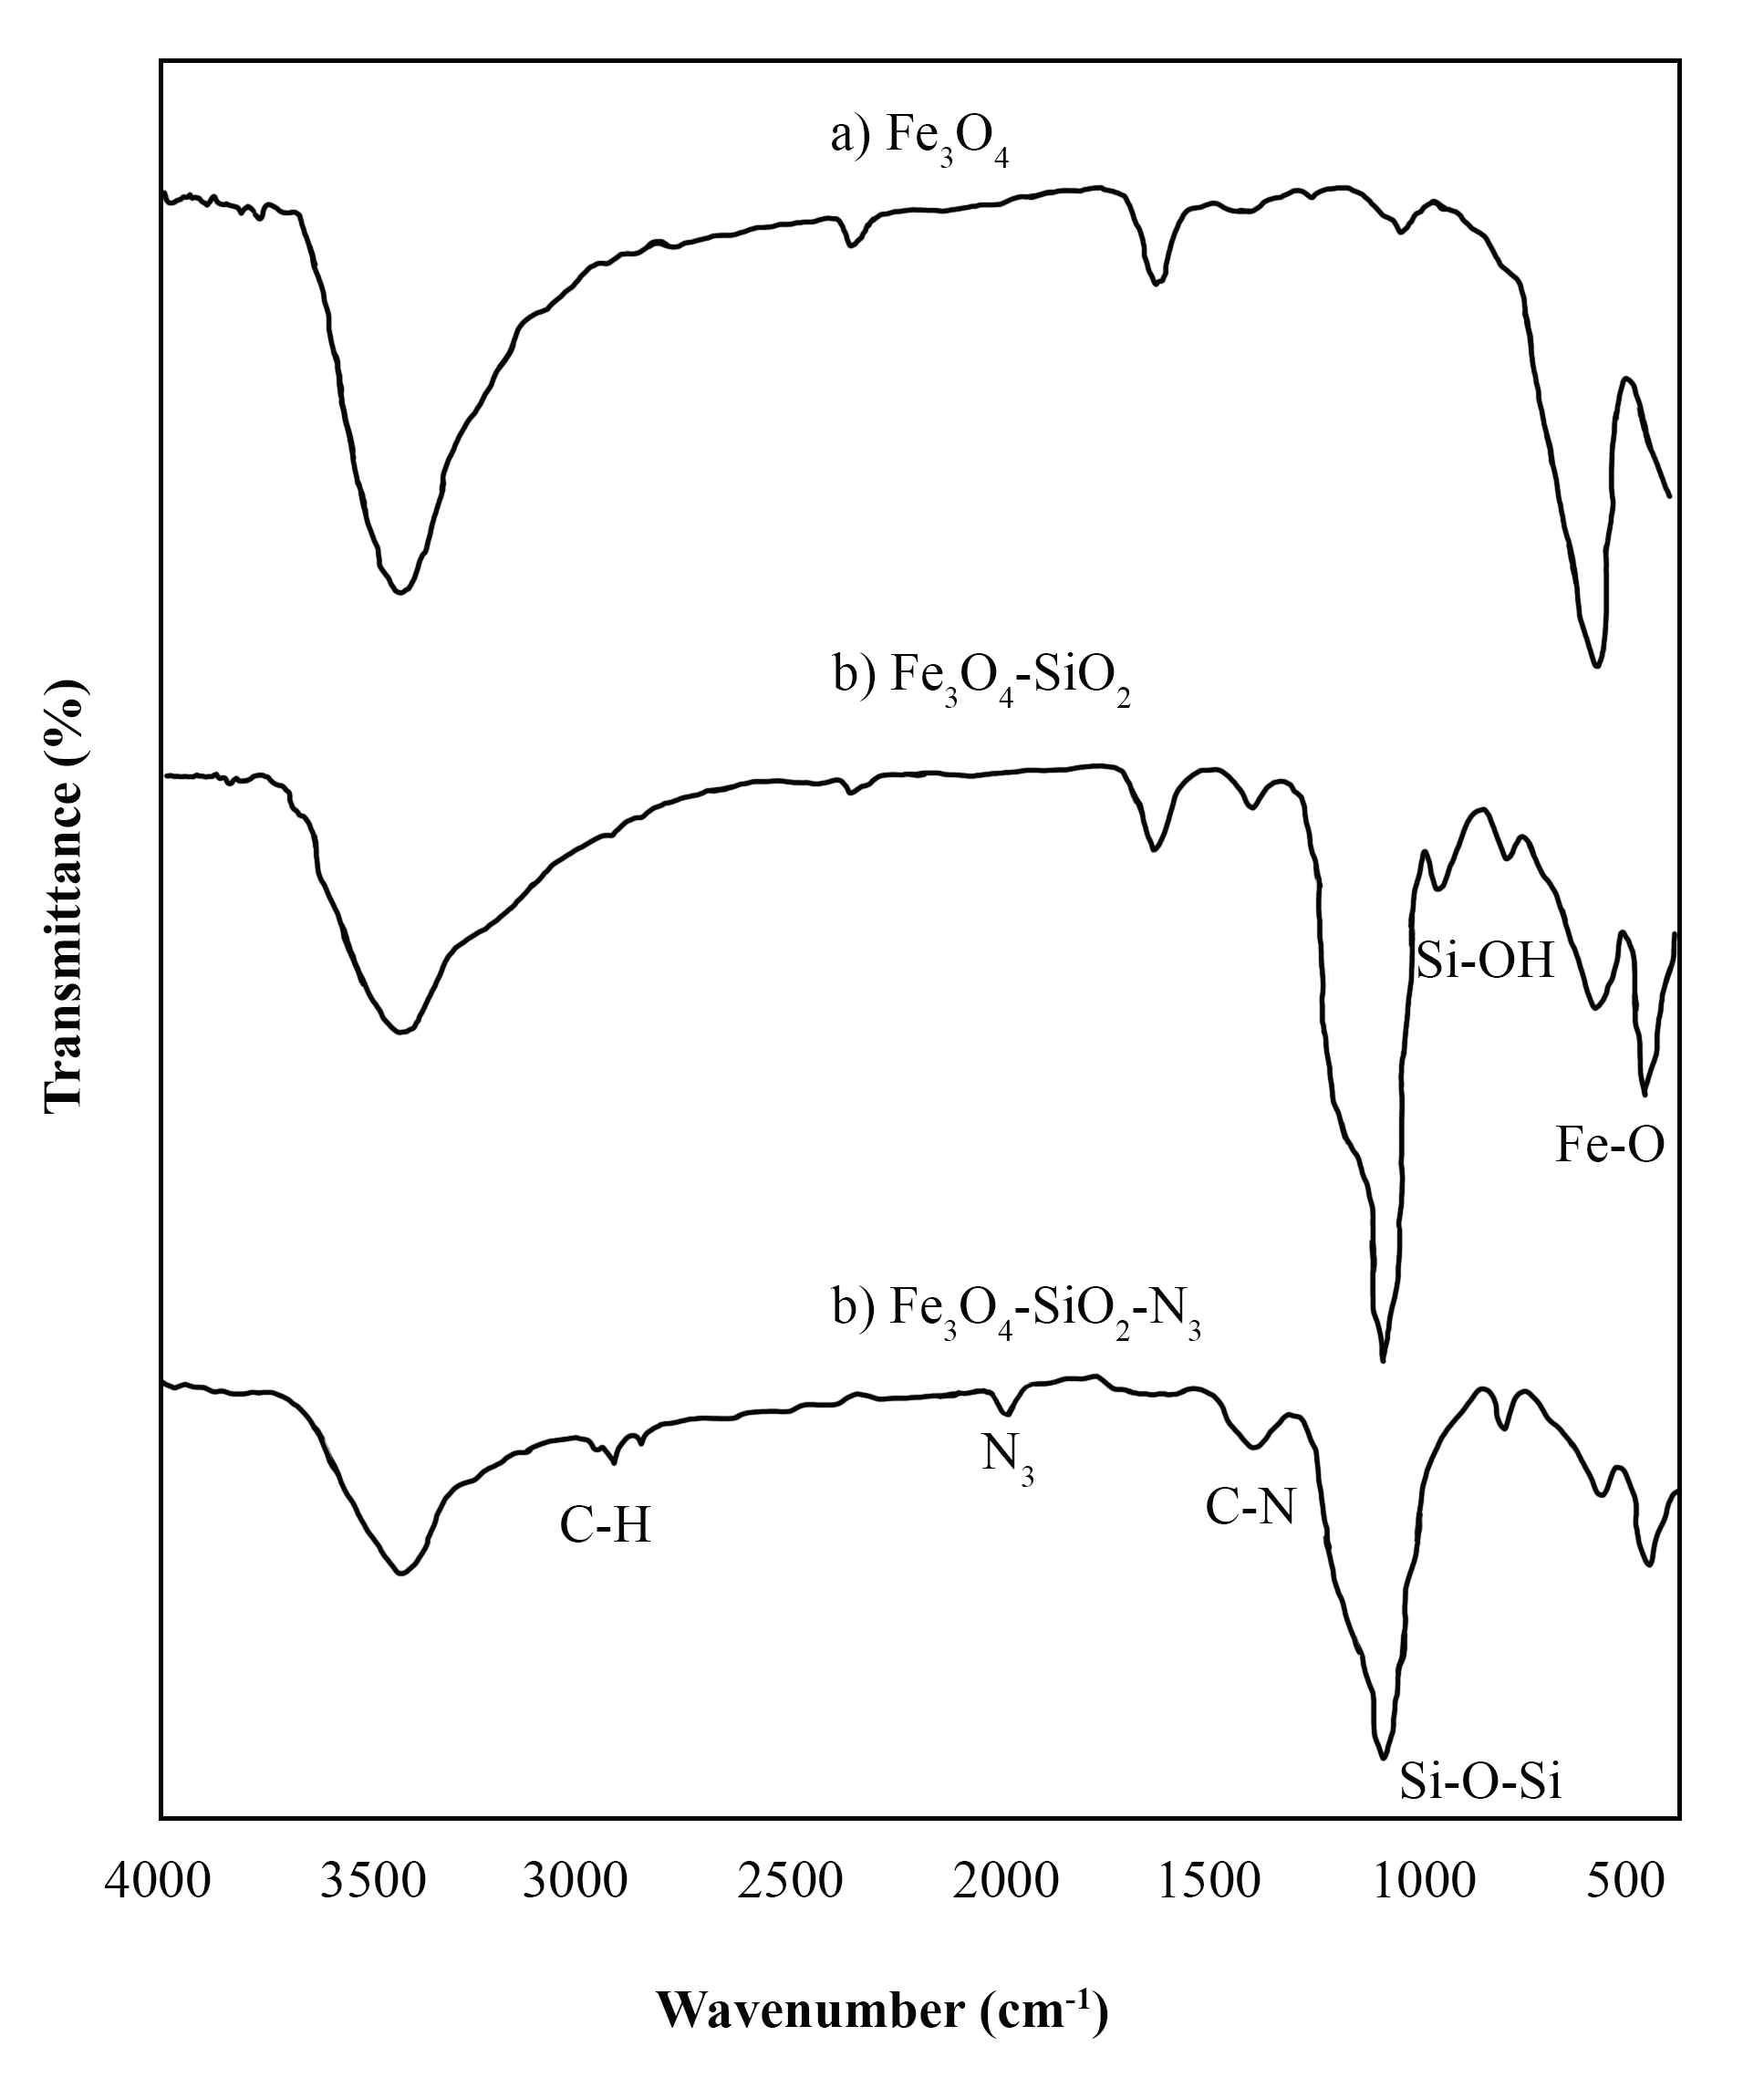


**Figure S1.** Fourier transform infrared (FTIR) spectra of a) Fe3O4, b) Fe3O4-SiO2, and c) Fe3O4-SiO2-N3.


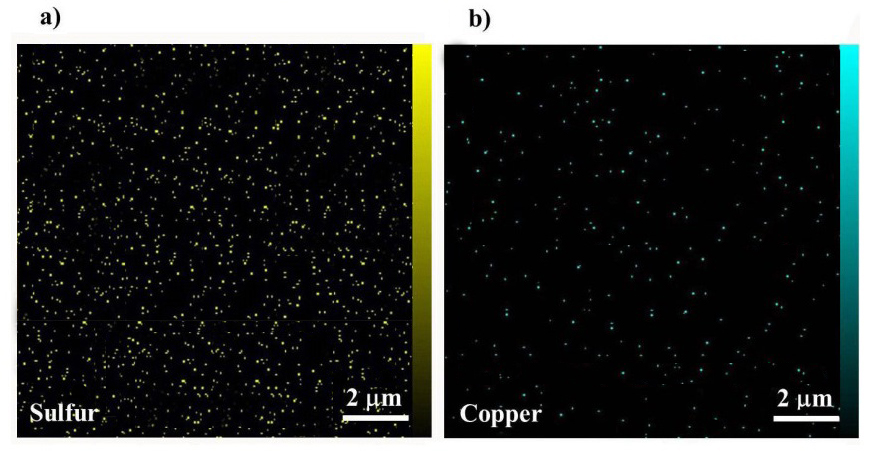


**Figure S2.** Color coded dot maps of copper atoms of immobilized laccase on Fe3O4.

*
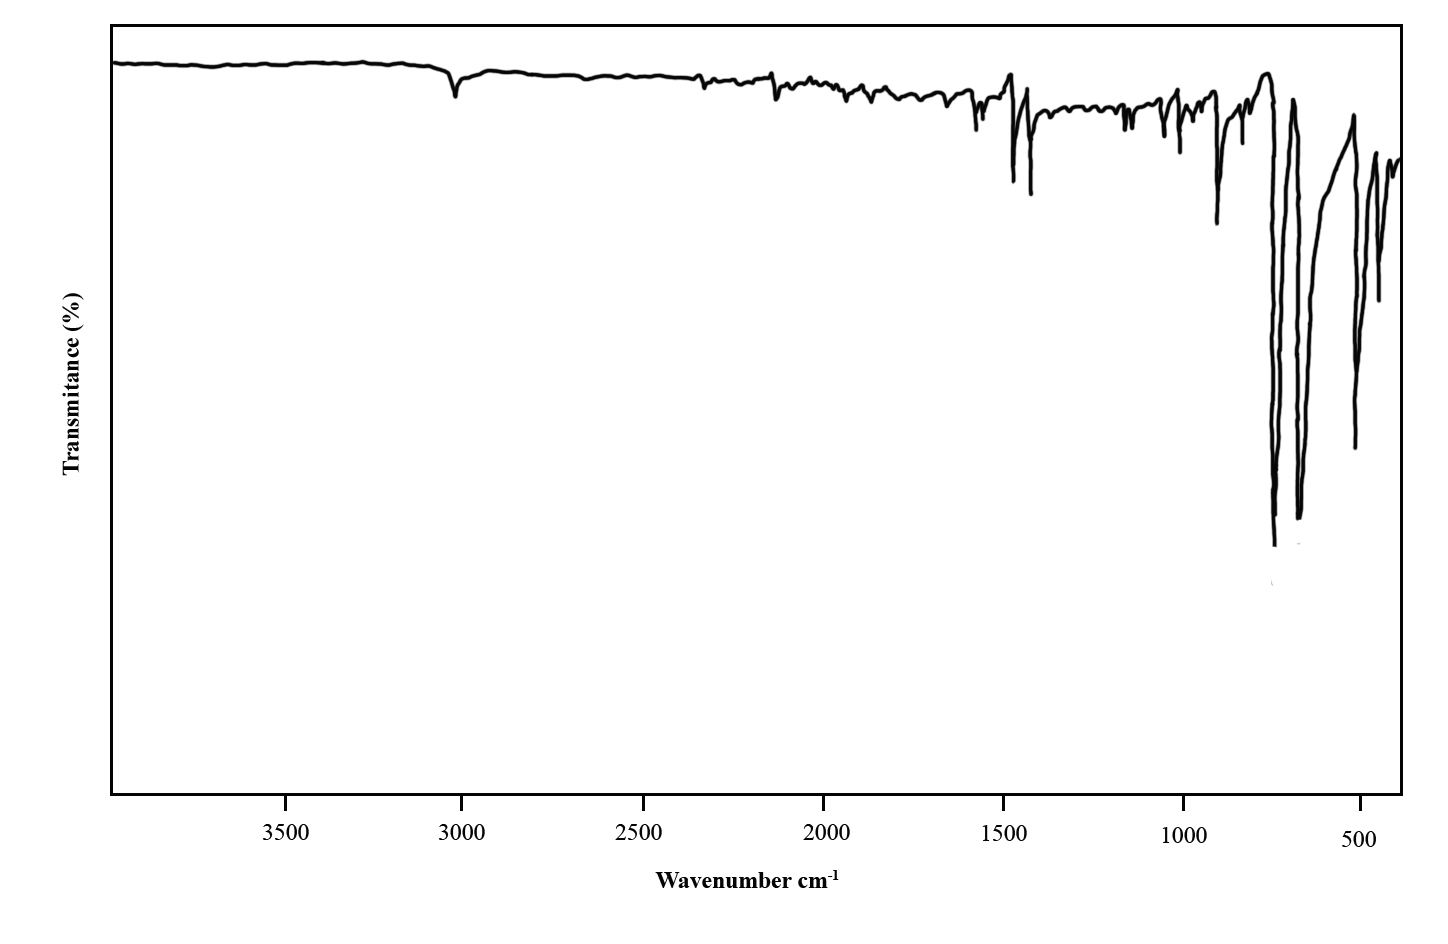
*

**Figure S3.** FTIR spectrum of 1,4-diphenylbutadiyne.


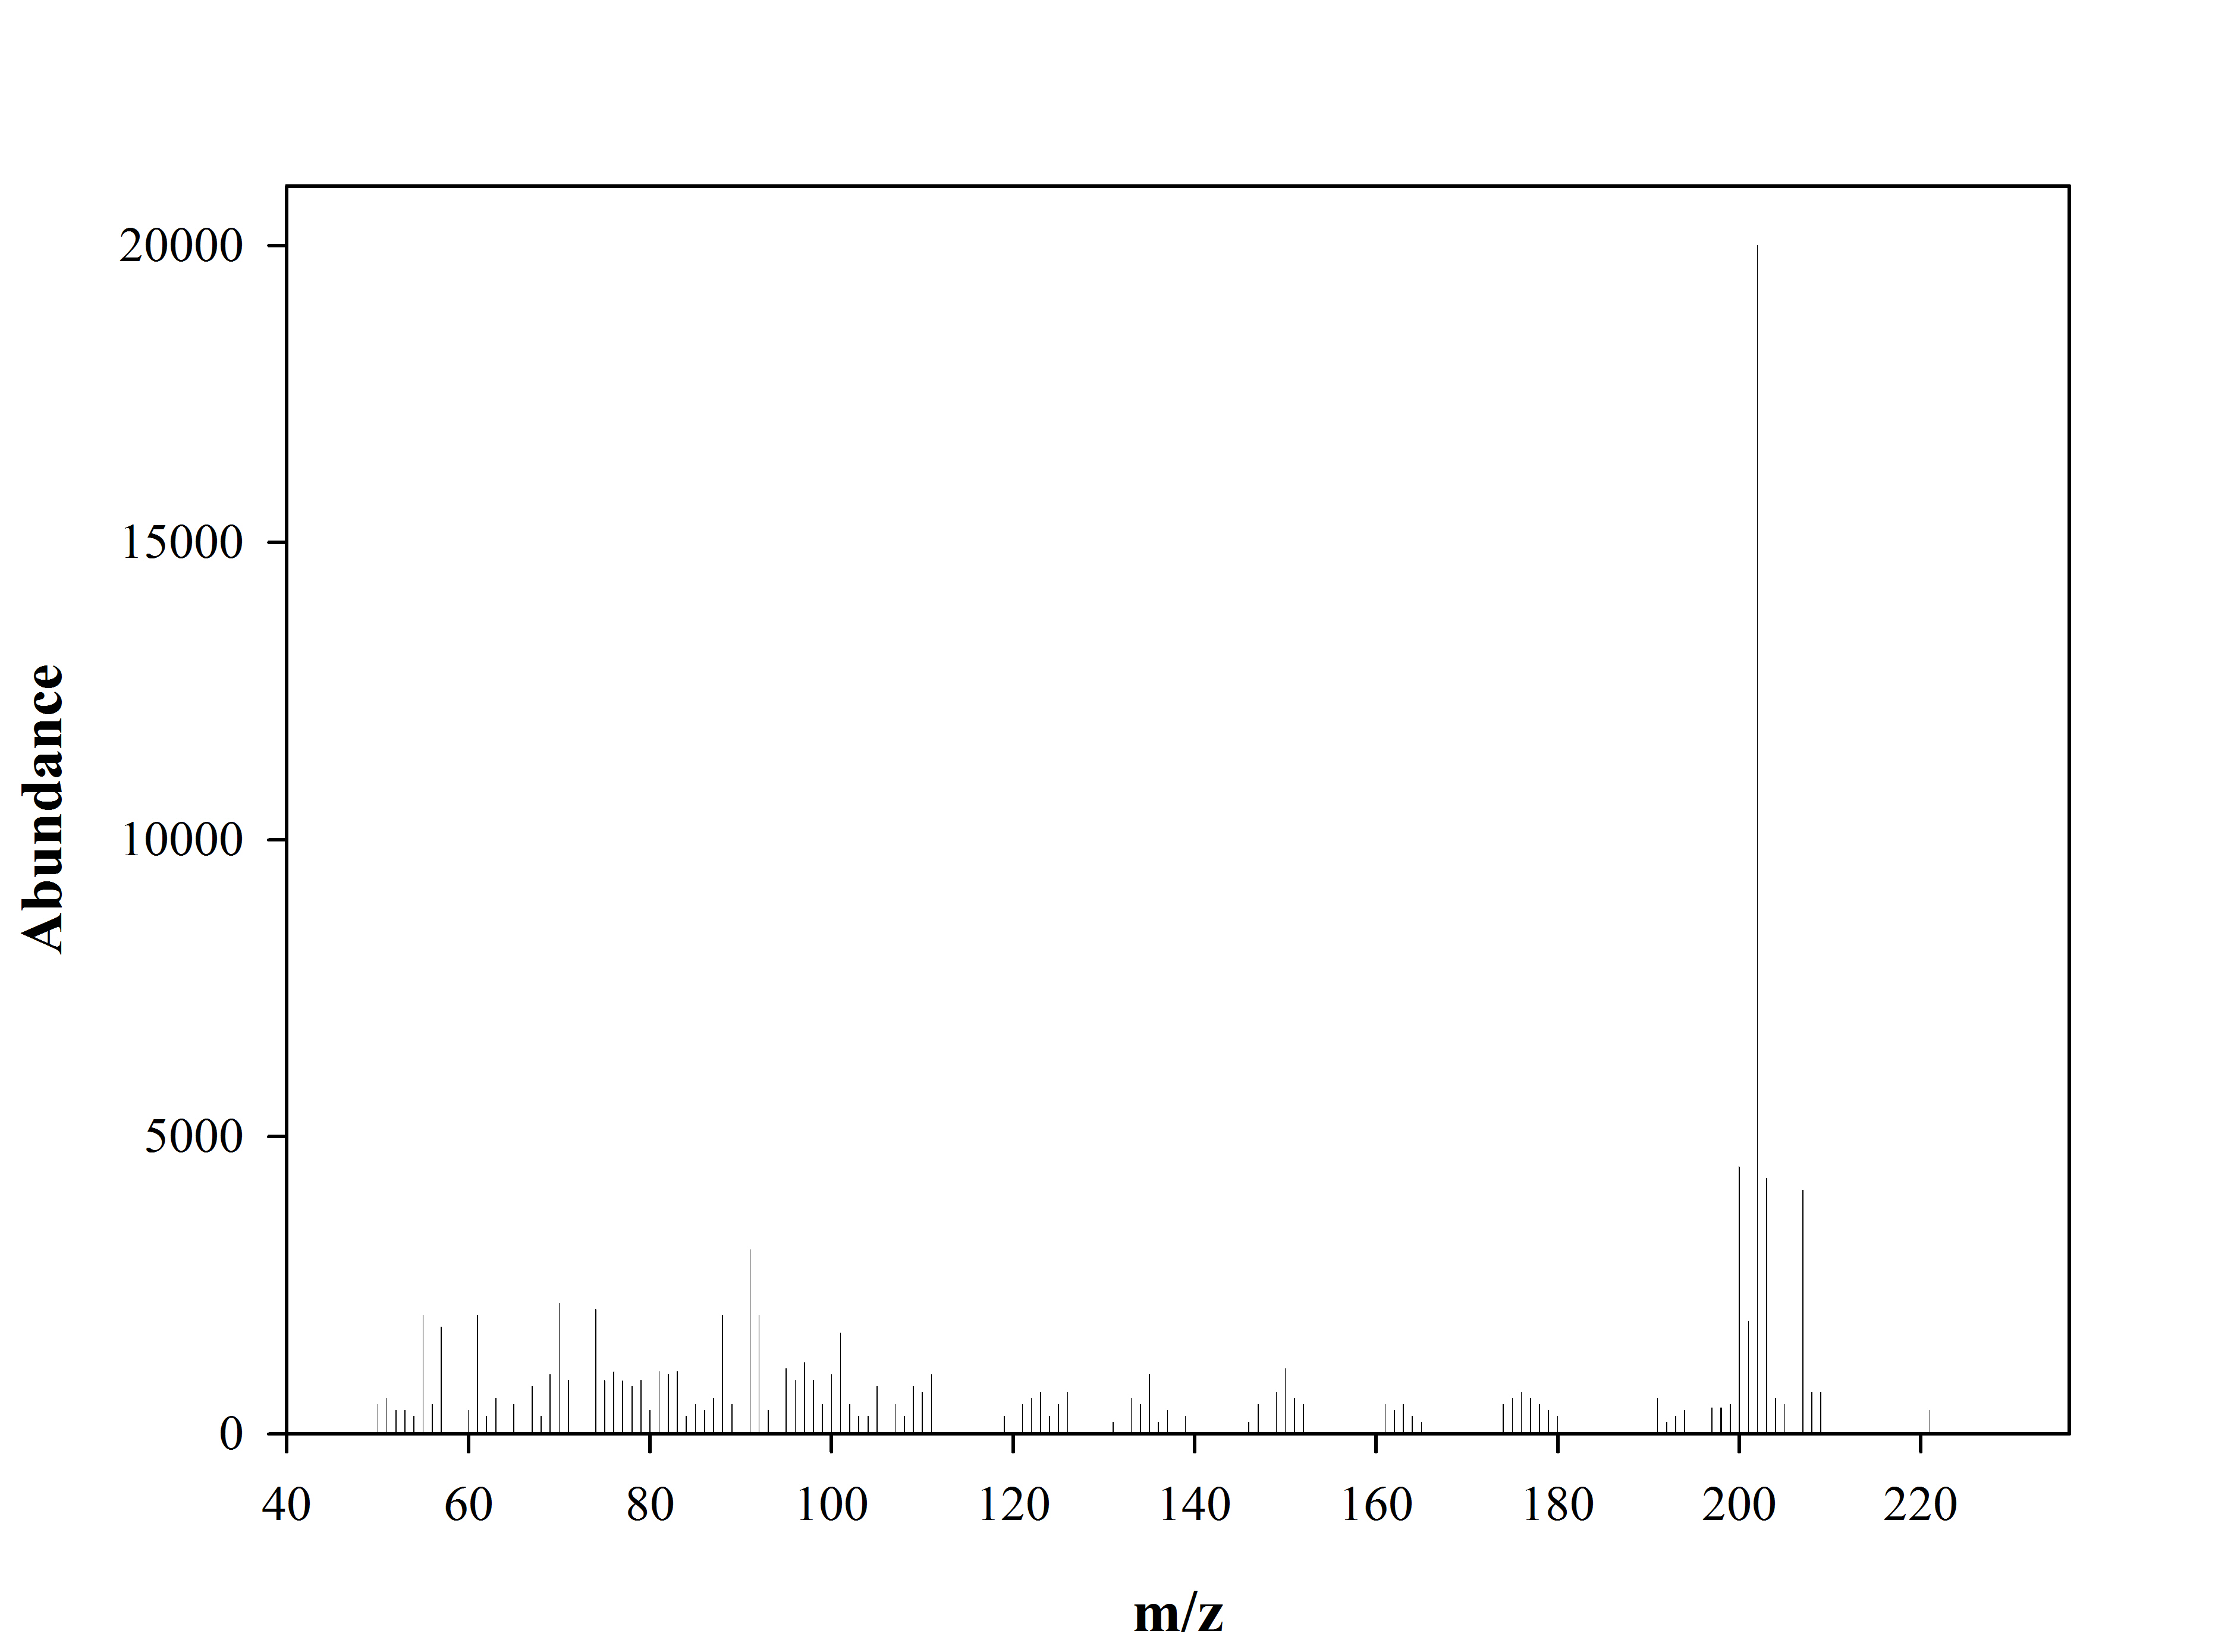


**Figure S4.** Mass spectrum of 1,4-diphenylbutadiyne.

**a)**


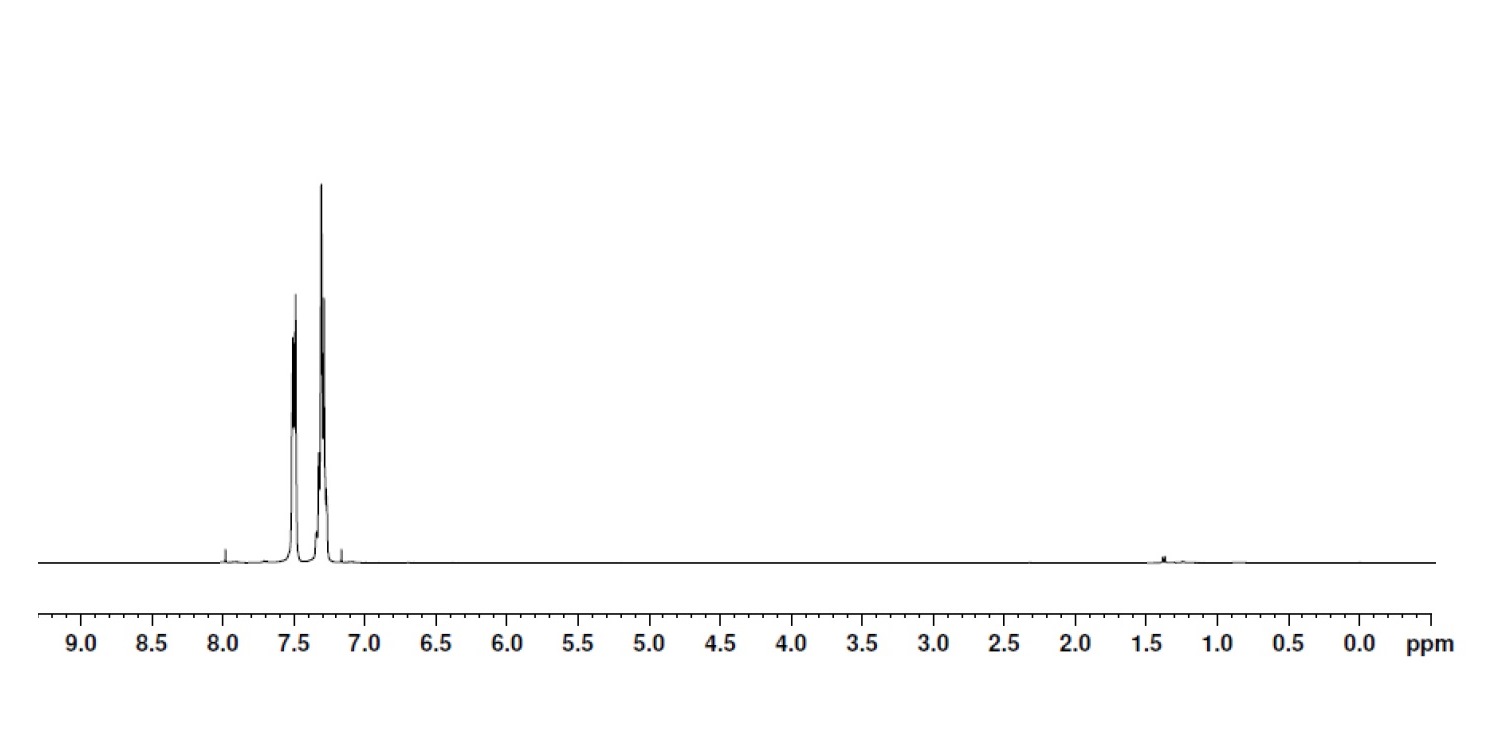


**b)**


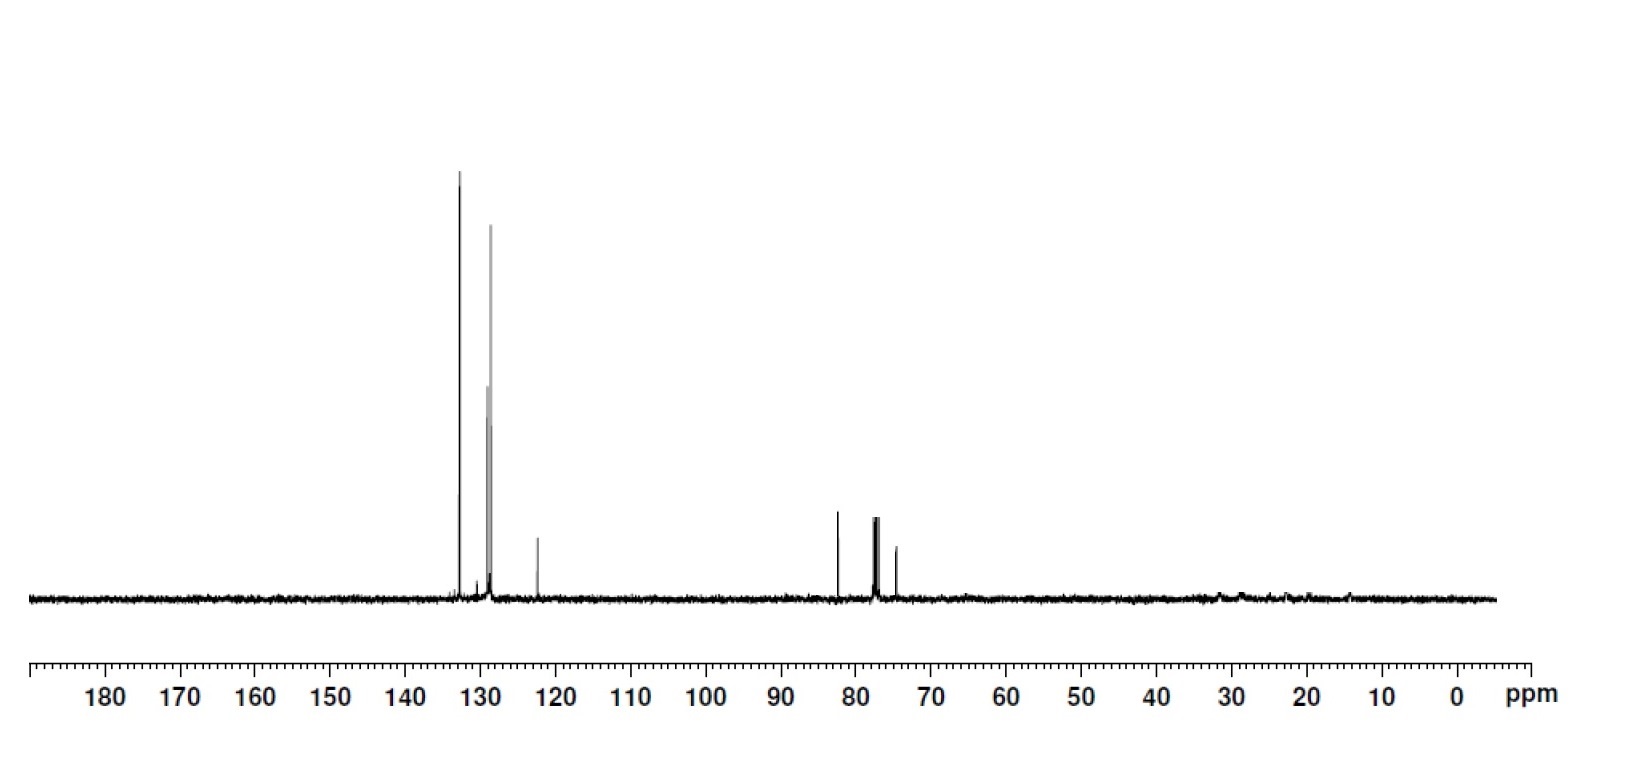


**Figure S5.** a) 1HNMR and b) 13CNMR of 1,4-diphenylbutadiyne.
